# Supplementary material for: A-site deficient semiconductor electrolyte Sr1−xCoxFeO3−δ for low-temperature (450–550 °C) solid oxide fuel cells
Source: Royal Society of Chemistry journal article supplement (doi:10.1039/d2ra03823d), 2022-01-01
Supplement: d2ra03823d1.pdf [file d2ra03823d1.pdf]

## A-site deficient semiconductor electrolyte $\text{Sr}_{1-x}\text{CO}_x\text{FeO}_{3-\delta}$ for low-temperature (450-550 °C) solid oxide fuel cell

Yuzheng Lu<sup>1</sup>, M.A.K. Yousaf Shah<sup>2\*</sup>, Naveed Mushtaq<sup>2</sup>, Muhammad Yousaf<sup>2</sup>, Muhammad Imran Asghar<sup>3,4</sup>, Peter D. Lund<sup>3</sup>, Bin Zhu<sup>2</sup>

<sup>1</sup>*School of Electronic Engineering, Nanjing Xiao Zhuang University, 211171 Nanjing, China.*

<sup>2</sup>*Jiangsu Provincial Key Laboratory of Solar Energy Science and Technology/Energy Storage joint Research Center, School of Energy and Environment, Southeast University, No.2 Si Pai Lou, Nanjing 210096, China.*

<sup>3</sup>*New Energy Technologies Group, Department of Applied Physics, Aalto University School of Science, P. O. Box 15100, FI-00076 Aalto, Espoo, Finland*

<sup>4</sup>*Faculty of Physics and Electronic Science, Hubei University, Wuhan, Hubei, 430062, China.*

*Corresponding author, MAK Yousaf Shah*

*Email address: [alikamranshah91@gmail.com](mailto:alikamranshah91@gmail.com)*

*Corresponding author, Muhammad Imran Asghar*

*Email address: [imran.asghar@aalto.fi](mailto:imran.asghar@aalto.fi)*

Fig.1(a) shows the SEM image of Ni-foam revealing the fine porous structure suggesting that Ni-foam is contributing significant role in the higher catalytic activity of fuel cell device. Also, Image J software was used to determine the pore size of Ni foam where different pore have different size, but the mean size was 112.8  $\mu\text{m}$  as shown in Fig.1(b). Also, Fig.1(c) shows the cross-sectional view of the pellet of SCF electrolyte after testing and Ni-NCAL symmetrical electrodes revealing the electrolyte is well sandwiched between two symmetrical porous electrodes.

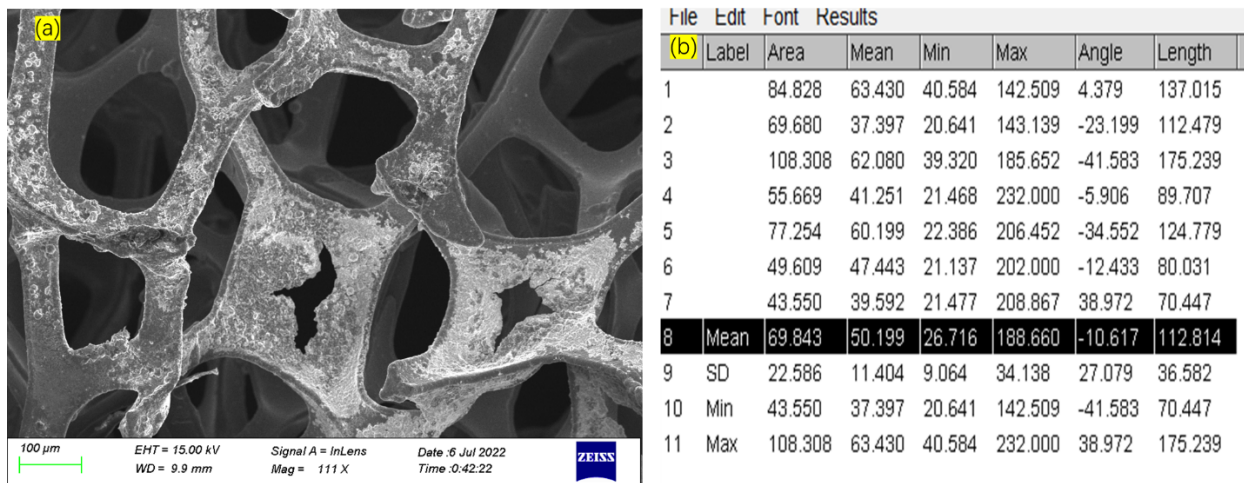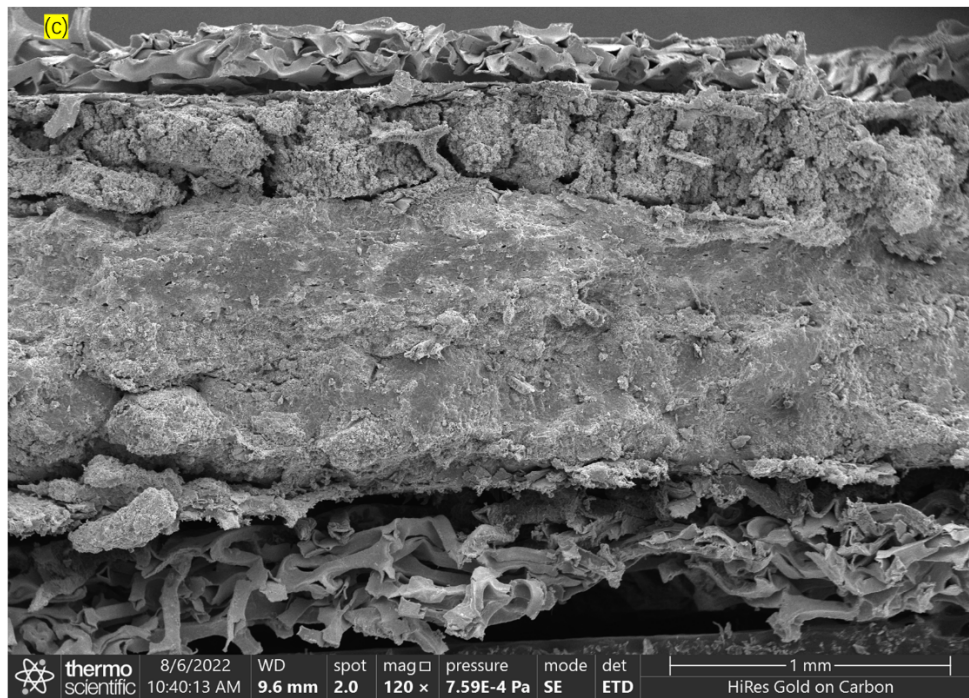

**Fig. 1(a-c) Ni-foam and pore size of Ni-foam and SEM cross-sectional view of the prepared pellet of SCF electrolyte and Ni-NCAL electrodes**

XPS spectra of sr-3d, Co-2p and Fe-2p have been investigated and presented in the Fig.2(a-c).

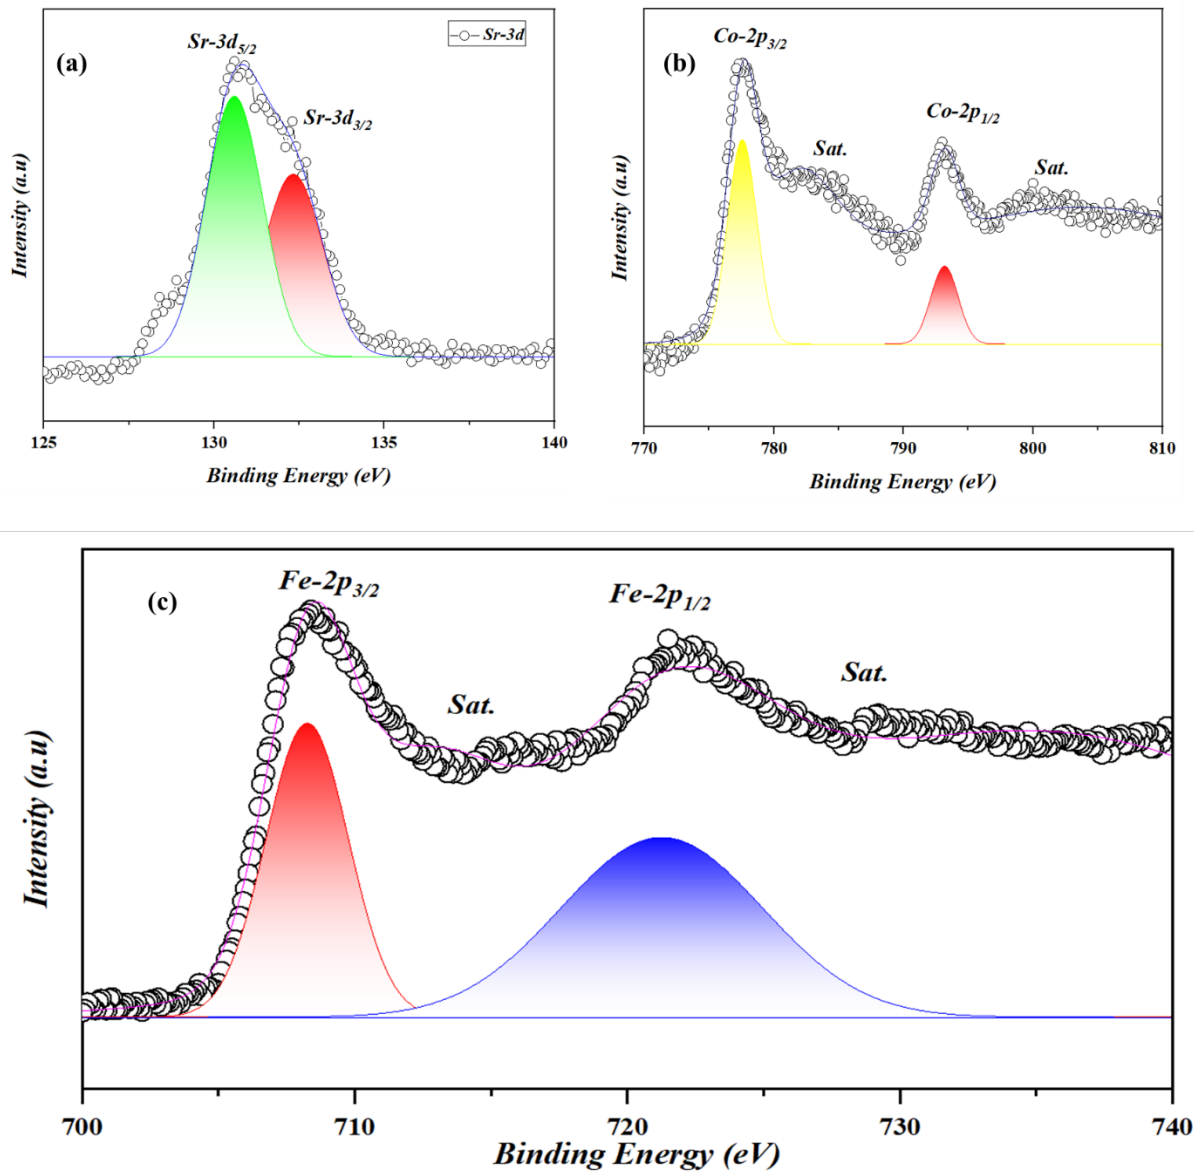

Fig.2(a-c) XPS spectra of Sr-3d, Co-2p and Fe-2p

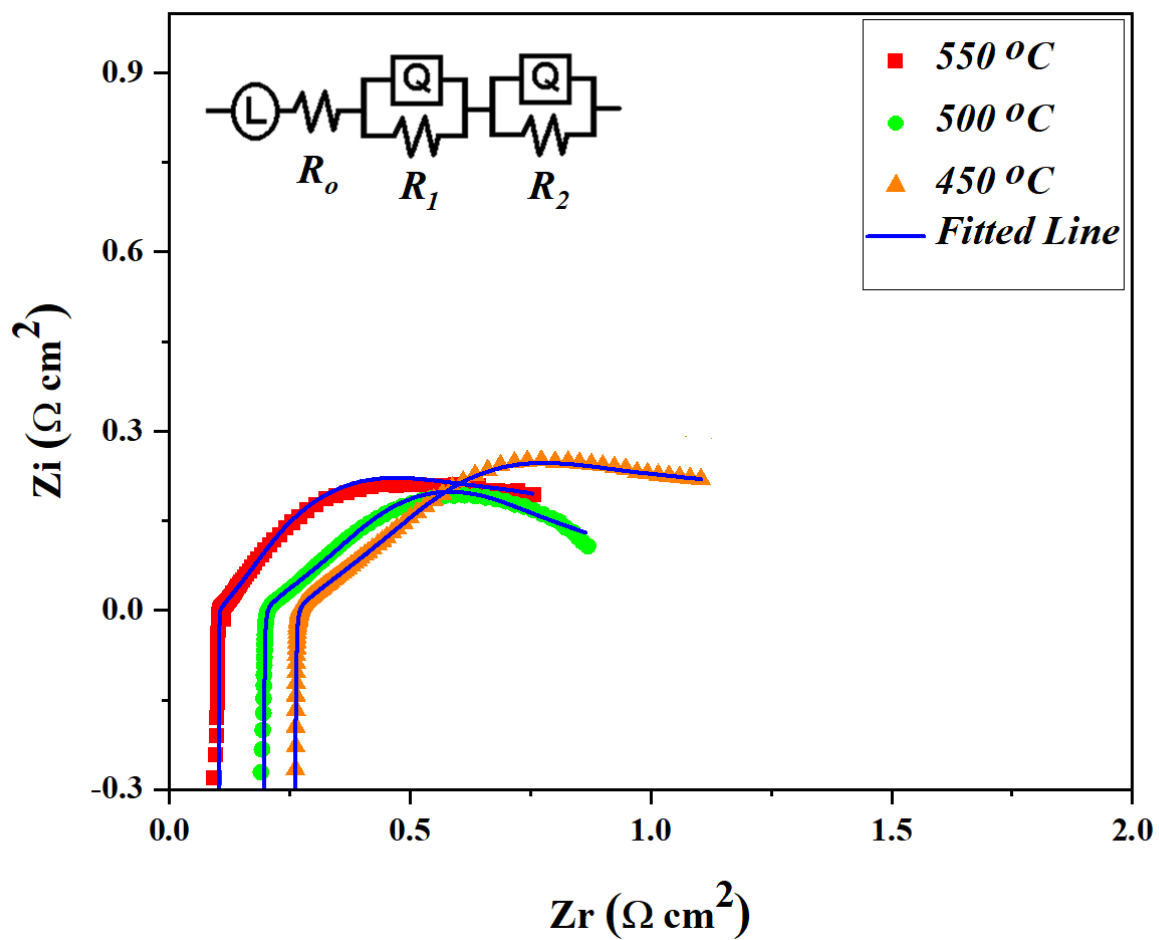

Fig.3 EIS spectra of SrCo<sub>0.3</sub>FeO<sub>3</sub> electrolyte under H<sub>2</sub>/Air environment at 550-450°C
